# Supplementary material for: Diatom diversity through HTS-metabarcoding in coastal European seas
Source: PubMed Central journal article supplement (PMC6305388; doi:10.1038/s41598-018-36345-9), 2018-12-24
Supplement: 41598_2018_36345_MOESM1_ESM.pdf [file 41598_2018_36345_MOESM1_ESM.pdf]

# Diatom diversity through HTS-metabarcoding in coastal European seas

Roberta Piredda, Jean-Michel Claverie, Johan Decelle, Colomban de Vargas, Micah Dunthorn, Bente Edvardsen, Wenche Eikrem, Dominik Forster, Wiebe H. C. F. Kooistra, Ramiro Logares, Ramon Massana, Marina Montresor, Fabrice Not, Hiroyuki Ogata, Jan Pawlowski, Sarah Romac, Diana Sarno, Thorsten Stoeck and Adriana Zingone

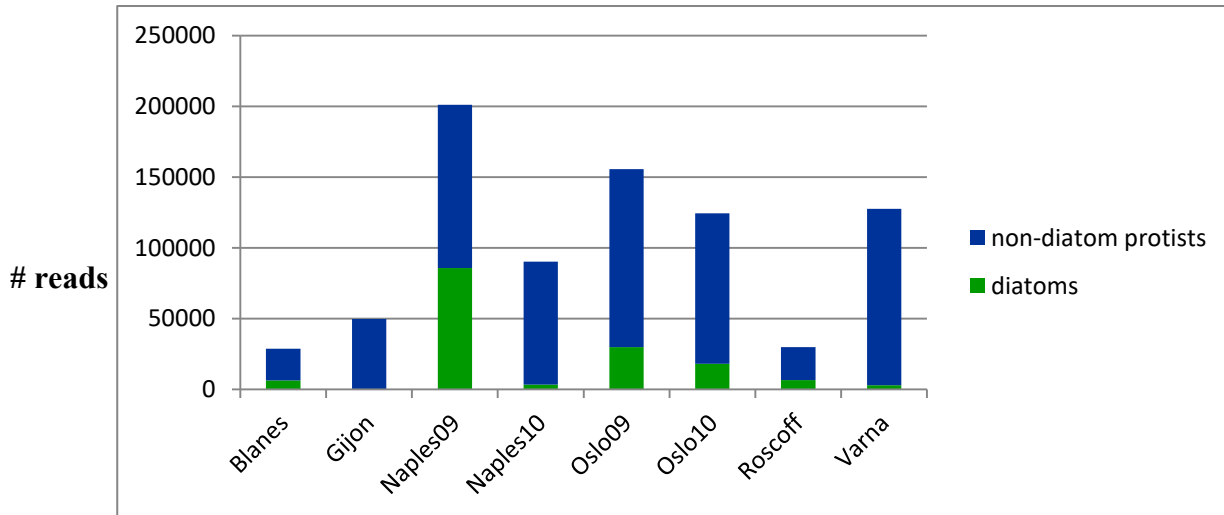

**Supplementary Figure S1.** Abundance of diatom and other protist reads at the six sampling sites.

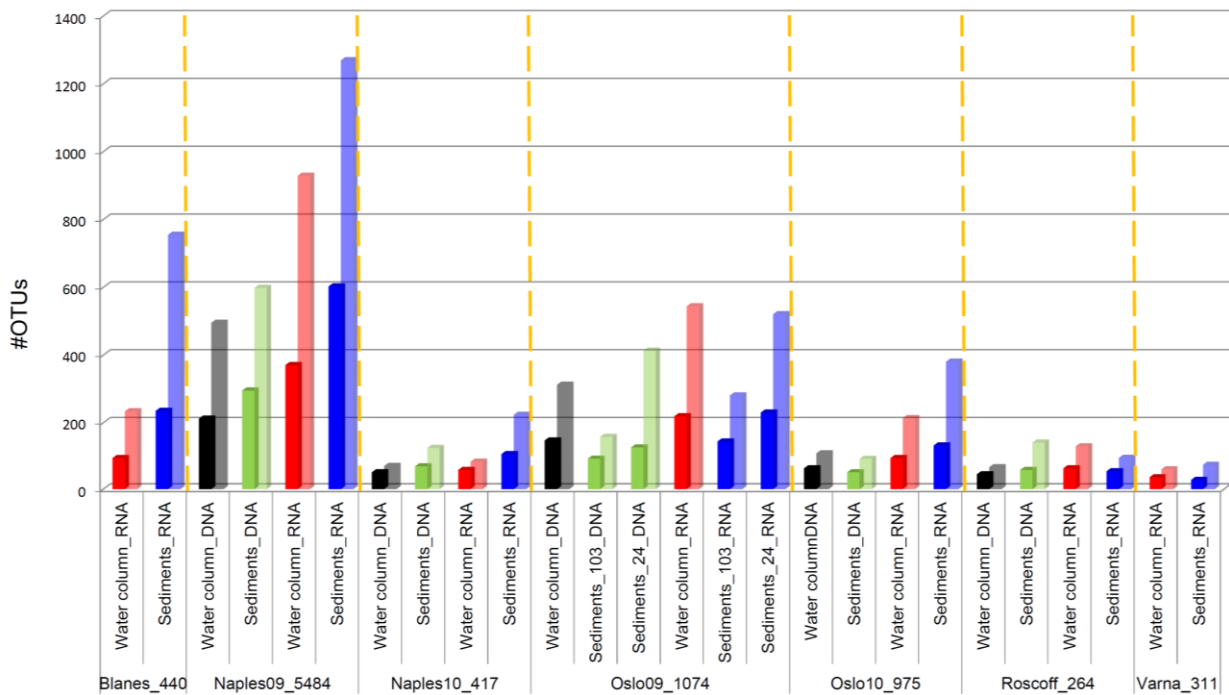

**Supplementary Figure S2.** Observed (dark colour) and estimated diversity (from chao index, light colour) in the four groups of samples pooled by template and by habitat at each sampling site. The number after each site name corresponds to the number of sequences normalised among the four groups at each site.

**Supplementary Table S1.** List of BioMarKS diatom read samples used in this study. Colour codes in column B correspond to those merged and used in Fig. 1a to show the distribution of diatom genera in the water column (green nuances) and sediments (purple nuances). Colour codes in column D correspond to those used in Fig. 1b and Fig. 4 to indicate different sampling sites. Bold in column E indicates samples used for the cluster analysis shown in Fig. 4.

|                                                                                     | <b>Samples</b>                       | <b>Samples codes</b> | <b>#reads</b> |
|-------------------------------------------------------------------------------------|--------------------------------------|----------------------|---------------|
|    | Blanes_Subsurface_Micro_DNA          | S0044                | 19            |
|    | <b>Blanes_Subsurface_Micro_RNA</b>   | S0155                | 360           |
|    | <b>Blanes_Subsurface_Nano_DNA</b>    | S0076                | 387           |
|    | <b>Blanes_Subsurface_Nano_RNA</b>    | S0066                | 2860          |
|    | Blanes_Subsurface_Pico_DNA           | S0077                | 34            |
|    | Blanes_Subsurface_Pico_RNA           | S0067                | 74            |
|    | <b>Blanes_Sediment_total_DNA</b>     | S0078                | 126           |
|    | <b>Blanes_Sediment_total_RNA</b>     | S0068                | 2553          |
|    | Gijon_Subsurface_Nano_DNA            | S0160                | 70            |
|    | Gijon_Subsurface_Nano_RNA            | S0158                | 39            |
|   | Gijon_Subsurface_Pico_DNA            | S0159                | 6             |
|  | Gijon_Subsurface_Pico_RNA            | S0157                | 6             |
|  | Naples09_Subsurface_Micro_DNA        | S0125                | 33            |
|  | <b>Naples09_Subsurface_Micro_RNA</b> | S0135                | 3101          |
|  | <b>Naples09_Subsurface_Nano_DNA</b>  | S0047                | 8169          |
|  | <b>Naples09_Subsurface_Nano_RNA</b>  | S0166                | 24777         |
|  | <b>Naples09_Subsurface_Pico_DNA</b>  | S0169                | 783           |
|  | <b>Naples09_Subsurface_Pico_RNA</b>  | S0163                | 1789          |
|  | <b>Naples09_DCM_Micro_DNA</b>        | S0170                | 453           |
|  | <b>Naples09_DCM_Micro_RNA</b>        | S0164                | 1996          |
|  | <b>Naples09_DCM_Nano_DNA</b>         | S0171                | 6561          |
|  | <b>Naples09_DCM_Nano_RNA</b>         | S0165                | 15698         |
|  | <b>Naples09_DCM_Pico_DNA</b>         | S0168                | 286           |
|  | <b>Naples09_DCM_Pico_RNA</b>         | S0162                | 694           |
|  | <b>Naples09_Sediment_total_DNA</b>   | S0008                | 5484          |
|  | <b>Naples09_Sediment_total_RNA</b>   | S0005                | 5524          |
|  | Naples10_Subsurface_Micro_DNA        | S0083                | 72            |
|  | Naples10_Subsurface_Micro_RNA        | S0073                | 18            |
|  | <b>Naples10_Subsurface_Nano_DNA</b>  | S0084                | 150           |
|  | Naples10_Subsurface_Nano_RNA         | S0074                | 58            |
|  | Naples10_Subsurface_Pico_DNA         | S0095                | 54            |
|  | Naples10_Subsurface_Pico_RNA         | S0085                | 15            |
|  | Naples10_DCM_Micro_DNA               | S0096                | 76            |
|  | Naples10_DCM_Micro_RNA               | S0086                | 63            |
|  | <b>Naples10_DCM_Nano_DNA</b>         | S0097                | 223           |

|                                                                                     |                                                                                     |                                     |       |      |
|-------------------------------------------------------------------------------------|-------------------------------------------------------------------------------------|-------------------------------------|-------|------|
|    |    | <b>Naples10_DCM_Nano_RNA</b>        | S0087 | 245  |
|    |                                                                                     | Naples10_DCM_Pico_DNA               | S0098 | 6    |
|    |                                                                                     | Naples10_DCM_Pico_RNA               | S0088 | 18   |
|    |                                                                                     | <b>Naples10_Sediment_total_DNA</b>  | S0099 | 1587 |
|    |                                                                                     | <b>Naples10_Sediment_total_RNA</b>  | S0089 | 879  |
|    |    | <b>Oslo09_Subsurface_Micro_DNA</b>  | S0075 | 2159 |
|    |                                                                                     | <b>Oslo09_Subsurface_Micro_RNA</b>  | S0065 | 2924 |
|    |                                                                                     | <b>Oslo09_Subsurface_Nano_DNA</b>   | S0142 | 3832 |
|    |                                                                                     | <b>Oslo09_Subsurface_Nano_RNA</b>   | S0132 | 3530 |
|    |                                                                                     | <b>Oslo09_Subsurface_Pico_DNA</b>   | S0141 | 1032 |
|    |                                                                                     | <b>Oslo09_Subsurface_Pico_RNA</b>   | S0131 | 1592 |
|    |                                                                                     | <b>Oslo09_DCM_Micro_DNA</b>         | S0138 | 636  |
|    |                                                                                     | <b>Oslo09_DCM_Micro_RNA</b>         | S0128 | 3100 |
|    |                                                                                     | <b>Oslo09_DCM_Nano_DNA</b>          | S0136 | 1413 |
|    |                                                                                     | <b>Oslo09_DCM_Nano_RNA</b>          | S0126 | 2797 |
|    |                                                                                     | <b>Oslo09_DCM_Pico_DNA</b>          | S0137 | 163  |
|    |                                                                                     | <b>Oslo09_DCM_Pico_RNA</b>          | S0127 | 282  |
|    |                                                                                     | <b>Oslo09_Sediment_103_DNA</b>      | S0139 | 1903 |
|   |                                                                                     | <b>Oslo09_Sediment_103_RNA</b>      | S0129 | 1074 |
|  |                                                                                     | <b>Oslo09_Sediment_24_DNA</b>       | S0140 | 2057 |
|  |                                                                                     | <b>Oslo09_Sediment_24_RNA</b>       | S0130 | 1451 |
|  |  | <b>Oslo10_Subsurface_Micro_DNA</b>  | S0118 | 122  |
|  |                                                                                     | <b>Oslo10_Subsurface_Micro_RNA</b>  | S0108 | 453  |
|  |                                                                                     | <b>Oslo10_Subsurface_Nano_DNA</b>   | S0117 | 2950 |
|  |                                                                                     | <b>Oslo10_Subsurface_Nano_RNA</b>   | S0107 | 415  |
|  |                                                                                     | <b>Oslo10_Subsurface_Pico_DNA</b>   | S0116 | 33   |
|  |                                                                                     | <b>Oslo10_Subsurface_Pico_RNA</b>   | S0106 | 20   |
|  |                                                                                     | <b>Oslo10_DCM_Nano_DNA</b>          | S0115 | 5283 |
|  |                                                                                     | <b>Oslo10_DCM_Nano_RNA</b>          | S0105 | 3999 |
|  |                                                                                     | <b>Oslo10_DCM_Pico_DNA</b>          | S0143 | 150  |
|  |                                                                                     | <b>Oslo10_DCM_Pico_RNA</b>          | S0133 | 57   |
|  |                                                                                     | <b>Oslo10_Sediment_total_DNA</b>    | S0144 | 3596 |
|  |                                                                                     | <b>Oslo10_Sediment_total_RNA</b>    | S0134 | 975  |
|  |  | <b>Roscoff_Subsurface_Micro_DNA</b> | S0079 | 285  |
|  |                                                                                     | <b>Roscoff_Subsurface_Micro_RNA</b> | S0069 | 756  |
|  |                                                                                     | <b>Roscoff_Subsurface_Nano_DNA</b>  | S0080 | 1406 |
|  |                                                                                     | <b>Roscoff_Subsurface_Nano_RNA</b>  | S0070 | 2976 |
|  |                                                                                     | <b>Roscoff_Subsurface_Pico_DNA</b>  | S0081 | 55   |
|  |                                                                                     | <b>Roscoff_Subsurface_Pico_RNA</b>  | S0071 | 83   |
|  |                                                                                     | <b>Roscoff_Sediment_total_DNA</b>   | S0082 | 264  |
|  |                                                                                     | <b>Roscoff_Sediment_total_RNA</b>   | S0072 | 795  |
|  |  | <b>Varna_Subsurface_Micro_DNA</b>   | S0100 | 1238 |
|  |                                                                                     | <b>Varna_Subsurface_Micro_RNA</b>   | S0090 | 339  |

|                                                                                   |                                 |       |     |
|-----------------------------------------------------------------------------------|---------------------------------|-------|-----|
|  | Varna_Subsurface_Nano_DNA       | S0101 | 42  |
|  | Varna_Subsurface_Nano_RNA       | S0091 | 19  |
|  | Varna_Subsurface_Pico_DNA       | S0102 | 12  |
|  | <b>Varna_DCM_Micro_DNA</b>      | S0103 | 473 |
|  | <b>Varna_DCM_Micro_RNA</b>      | S0093 | 301 |
|  | <b>Varna_DCM_Nano_DNA</b>       | S0104 | 170 |
|  | <b>Varna_DCM_Nano_RNA</b>       | S0094 | 122 |
|  | Varna_DCM_Pico_DNA              | S0122 | 22  |
|  | Varna_DCM_Pico_RNA              | S0112 | 20  |
|  | Varna_Sediment_total_DNA        | S0123 | 3   |
|  | <b>Varna_Sediment_total_RNA</b> | S0113 | 311 |

**Supplementary Table S2.** List of samples grouped by habitat and template with their corresponding number of reads, as used in Figs. 5.

**Water Column rDNA**

**Water Column rRNA**

| <b>grouped samples</b>        | <b>#reads</b> | <b>grouped samples</b>        | <b>#reads</b> |
|-------------------------------|---------------|-------------------------------|---------------|
| Naples09_DCM_Micro_DNA        | 453           | Naples09_DCM_Micro_RNA        | 1996          |
| Naples09_DCM_Nano_DNA         | 6561          | Naples09_DCM_Nano_RNA         | 15698         |
| Naples09_DCM_Pico_DNA         | 286           | Naples09_DCM_Pico_RNA         | 694           |
| Naples10_DCM_Micro_DNA        | 76            | Naples10_DCM_Micro_RNA        | 63            |
| Naples10_DCM_Nano_DNA         | 223           | Naples10_DCM_Nano_RNA         | 245           |
| Naples10_DCM_Pico_DNA         | 6             | Naples10_DCM_Pico_RNA         | 18            |
| Oslo09_DCM_Micro_DNA          | 636           | Oslo09_DCM_Micro_RNA          | 3100          |
| Oslo09_DCM_Nano_DNA           | 1413          | Oslo09_DCM_Nano_RNA           | 2797          |
| Oslo09_DCM_Pico_DNA           | 163           | Oslo09_DCM_Pico_RNA           | 282           |
| Oslo10_DCM_Nano_DNA           | 5283          | Oslo10_DCM_Nano_RNA           | 3999          |
| Oslo10_DCM_Pico_DNA           | 150           | Oslo10_DCM_Pico_RNA           | 57            |
| Varna_DCM_Micro_DNA           | 473           | Varna_DCM_Micro_RNA           | 301           |
| Varna_DCM_Nano_DNA            | 170           | Varna_DCM_Nano_RNA            | 122           |
| Varna_DCM_Pico_DNA            | 22            | Varna_DCM_Pico_RNA            | 20            |
| Blanes_Subsurface_Micro_DNA   | 19            | Blanes_Subsurface_Micro_RNA   | 360           |
| Blanes_Subsurface_Nano_DNA    | 387           | Blanes_Subsurface_Nano_RNA    | 2860          |
| Blanes_Subsurface_Pico_DNA    | 34            | Blanes_Subsurface_Pico_RNA    | 74            |
| Gijon_Subsurface_Nano_DNA     | 70            | Gijon_Subsurface_Nano_RNA     | 39            |
| Gijon_Subsurface_Pico_DNA     | 6             | Gijon_Subsurface_Pico_RNA     | 6             |
| Naples09_Subsurface_Micro_DNA | 33            | Naples09_Subsurface_Micro_RNA | 3101          |
| Naples09_Subsurface_Nano_DNA  | 8169          | Naples09_Subsurface_Nano_RNA  | 24777         |
| Naples09_Subsurface_Pico_DNA  | 783           | Naples09_Subsurface_Pico_RNA  | 1789          |
| Naples10_Subsurface_Micro_DNA | 72            | Naples10_Subsurface_Micro_RNA | 18            |
| Naples10_Subsurface_Nano_DNA  | 150           | Naples10_Subsurface_Nano_RNA  | 58            |
| Naples10_Subsurface_Pico_DNA  | 54            | Naples10_Subsurface_Pico_RNA  | 15            |
| Oslo09_Subsurface_Micro_DNA   | 2159          | Oslo09_Subsurface_Micro_RNA   | 2924          |
| Oslo09_Subsurface_Nano_DNA    | 3832          | Oslo09_Subsurface_Nano_RNA    | 3530          |
| Oslo09_Subsurface_Pico_DNA    | 1032          | Oslo09_Subsurface_Pico_RNA    | 1592          |
| Oslo10_Subsurface_Micro_DNA   | 122           | Oslo10_Subsurface_Micro_RNA   | 453           |
| Oslo10_Subsurface_Nano_DNA    | 2950          | Oslo10_Subsurface_Nano_RNA    | 415           |
| Oslo10_Subsurface_Pico_DNA    | 33            | Oslo10_Subsurface_Pico_RNA    | 20            |
| Roscoff_Subsurface_Micro_DNA  | 285           | Roscoff_Subsurface_Micro_RNA  | 756           |
| Roscoff_Subsurface_Nano_DNA   | 1406          | Roscoff_Subsurface_Nano_RNA   | 2976          |
| Roscoff_Subsurface_Pico_DNA   | 55            | Roscoff_Subsurface_Pico_RNA   | 83            |
| Varna_Subsurface_Micro_DNA    | 1238          | Varna_Subsurface_Micro_RNA    | 339           |
| Varna_Subsurface_Nano_DNA     | 42            | Varna_Subsurface_Nano_RNA     | 19            |
| Varna_Subsurface_Pico_DNA     | 12            |                               |               |
|                               |               | <b>TOTAL</b>                  | <b>75596</b>  |
| <b>TOTAL</b>                  | <b>38858</b>  |                               |               |

**Sediment rDNA**

| <b>grouped samples</b>      | <b>#reads</b> |
|-----------------------------|---------------|
| Blanes_Sediment_total_DNA   | 126           |
| Naples09_Sediment_total_DNA | 5484          |
| Naples10_Sediment_total_DNA | 1587          |
| Oslo09_Sediment_103_DNA     | 1903          |
| Oslo09_Sediment_24_DNA      | 2057          |
| Oslo10_Sediment_total_DNA   | 3596          |
| Roscoff_Sediment_total_DNA  | 264           |
| Varna_Sediment_total_DNA    | 3             |
| <b>TOTAL</b>                | <b>15020</b>  |

**Sediment rRNA**

| <b>grouped samples</b>      | <b>#reads</b> |
|-----------------------------|---------------|
| Blanes_Sediment_total_RNA   | 2553          |
| Naples09_Sediment_total_RNA | 5524          |
| Naples10_Sediment_total_RNA | 879           |
| Oslo09_Sediment_103_RNA     | 1074          |
| Oslo09_Sediment_24_RNA      | 1451          |
| Oslo10_Sediment_total_RNA   | 975           |
| Roscoff_Sediment_total_RNA  | 795           |
| Varna_Sediment_total_RNA    | 311           |
| <b>TOTAL</b>                | <b>13562</b>  |

**Supplementary Table S3.** Summary of sample grouping and number of sequences available for analyses represented in the Suppl. Fig. S2.

| Site         | Water column |              | Total water column | Sediments    |              | Deep sediments |             | Total sediments |
|--------------|--------------|--------------|--------------------|--------------|--------------|----------------|-------------|-----------------|
|              | rDNA         | rRNA         |                    | rDNA         | rRNA         | rDNA           | rRNA        |                 |
| Blanes       | 440          | 3294         | 3734               | 126          | 2553         |                |             | 2679            |
| Gijon        | 76           | 45           | 121                |              |              |                |             |                 |
| Naples_09    | 16285        | 48055        | 64340              | 5484         | 5524         |                |             | 11008           |
| Naples_10    | 581          | 417          | 998                | 1587         | 879          |                |             | 2466            |
| Oslo_09      | 9235         | 14225        | 23460              | 2056         | 1451         | 1904           | 1074        | 6485            |
| Oslo_10      | 8538         | 4944         | 13482              | 3596         | 975          |                |             | 4571            |
| Roscoff      | 1746         | 3815         | 5561               | 264          | 795          |                |             | 1059            |
| Varna        | 1957         | 801          | 2758               | 3            | 311          |                |             | 314             |
| <b>TOTAL</b> | <b>38858</b> | <b>75596</b> | <b>114454</b>      | <b>13116</b> | <b>12488</b> | <b>1904</b>    | <b>1074</b> | <b>28582</b>    |
|              |              |              | <b>Total rDNA</b>  | <b>53878</b> |              |                |             |                 |
|              |              |              | <b>Total rRNA</b>  | <b>89158</b> |              |                |             |                 |



(Supplementary Table 4, see excel file)

**Supplementary Table S5.** Percent of OTUs shared or exclusive among subsets (reads in brackets). Total Template is based on merged habitats, while Total Habitats is based on merged templates. rRNA showed the highest number of exclusive OTUs and sequences in both the water column and the sediments.

| <b>Total Template</b>                  |            |            |
|----------------------------------------|------------|------------|
|                                        | rDNA       | rRNA       |
| percent shared OTUs (% seqs)           | 17% (95%)  |            |
| percent exclusive OTUs (% seqs)        | 14% (0.7%) | 69% (4.2%) |
| <b>Water Column</b>                    |            |            |
|                                        | rDNA       | rRNA       |
| percent shared OTUs (% seqs)           | 35% (92%)  |            |
| percent exclusive OTUs (% seqs)        | 12% (1.2%) | 52% (5.8%) |
| <b>Sediments</b>                       |            |            |
|                                        | rDNA       | rRNA       |
| <b>percent shared OTUs (% seqs)</b>    | 14% (87%)  |            |
| <b>percent exclusive OTUs (% seqs)</b> | 10% (1.3%) | 60% (10%)  |
| <b>Total Habitat</b>                   |            |            |
|                                        | Column     | Sediment   |
| percent shared OTUs (% seqs)           | 10% (80%)  |            |
| percent exclusive OTUs (% seqs)        | 52% (12%)  | 36% (8.6%) |

**Supplementary Table S6.** Summary of normalized alpha diversity in the four groups of samples merged by template and habitat (see Supplementary Table S2).

|                          | <b>#seqs</b> | <b>sobs</b> | <b>chao</b> | <b>shannon</b> |
|--------------------------|--------------|-------------|-------------|----------------|
| <b>Water Column_rDNA</b> | 13563        | 632         | 1359        | 3.63           |
| <b>Sediment_rDNA</b>     | 13563        | 576         | 1230        | 3.53           |
| <b>Water Column_rRNA</b> | 13563        | 1451        | 3722        | 4.82           |
| <b>Sediment_rRNA</b>     | 13563        | 1784        | 4192        | 5.41           |

**Supplementary Table S7.** Number of OTUs generated at different thresholds of similarity. The number of OTUs at the threshold of 93% represented the best match with the number of taxonomic assignment (341 taxa).

| <b>Clustering threshold</b> | <b>99%</b> | <b>98%</b> | <b>97%</b> | <b>96%</b> | <b>95%</b> | <b>94%</b> | <b>93%</b> | <b>92%</b> |
|-----------------------------|------------|------------|------------|------------|------------|------------|------------|------------|
| <b>#OTUs</b>                | 4587       | 1740       | 1102       | 784        | 580        | 435        | 343        | 275        |

**Supplementary Dataset 1. *Skeletonema tropicum* and *S. pseudocostatum* V4 sequences.**

>DQ396517.1\_S.\_tropicum\_strain\_CCMP\_2070

AGCTCCAATAGCGTATATTAAGTTGTTGCAGTTAAAAAGCTCGTAGTTGGATTTCTGGC  
AGGAGTGACCGACCACACACACCGTGTGTGAGTTGTGTCATTCTGGCCATCCTTGGTGAG  
ATCCTATTTGGCATTAAAGTTGTCGGGTAGGGGATAACCATCGTTTACTGTGAAAAAATTA  
GAGTGTTTAAAGCAGGCTTATGCCGTTGAATATATTAGCATGGAATAATAAGATAGGACT  
TTGAGTCTATTTTGTGGTTTTCGAGTCAAAGTAATGATTAATAGGGACAGTTGGGGGTA  
TTCGTATTTTCATTGTCAGAGGTGAAATTCTGGATTTCTGAAAGACGAACTACTGCGAAA  
GCATTTACCAAGGATGTTTTCA

>DQ396516.1\_S.\_tropicum\_strain\_B210

AGCTCCAATAGCGTATATTAAGTTGTTGCAGTTAAAAAGCTCGTAGTTGGATTTCTGGC  
AGGAGTGACCGACCACACACACCGTGTGTGAGTTGTGTCATTCTGGCCATCCTTGGTGAG  
ATCCTATTTGGCATTAAAGTTGTCGGGTAGGGGATAACCATCGTTTACTGTGAAAAAATTA  
GAGTGTTTAAAGCAGGCTTATGCCGTTGAATATATTAGCATGGAATAATAAGATAGGACT  
TTGAGTCTATTTTGTGGTTTTCGAGTCAAAGTAATGATTAATAGGGACAGTTGGGGGTA  
TTCGTATTTTCATTGTCAGAGGTGAAATTCTGGATTTCTGAAAGACGAACTACTGCGAAA  
GCATTTACCAAGGATGTTTTCA

>DQ396515.1\_S.\_tropicum\_strain\_B205

AGCTCCAATAGCGTATATTAAGTTGTTGCAGTTAAAAAGCTCGTAGTTGGATTTCTGGC  
AGGAGTGACCGACCACACACACCGTGTGTGAGTTGTGTCATTCTGGCCATCCTTGGTGAG  
ATCCTATTTGGCATTAAAGTTGTCGGGTAGGGGATAACCATCGTTTACTGTGAAAAAATTA  
GAGTGTTTAAAGCAGGCTTATGCCGTTGAATATATTAGCATGGAATAATAAGATAGGACT  
TTGAGTCTATTTTGTGGTTTTCGAGTCAAAGTAATGATTAATAGGGACAGTTGGGGGTA  
TTCGTATTTTCATTGTCAGAGGTGAAATTCTGGATTTCTGAAAGACGAACTACTGCGAAA  
GCATTTACCAAGGATGTTTTCA

>X85393.1\_S.\_pseudocostatum\_strain\_CCAP\_1077/6

AGCTCCAATAGCGTATATTAAGTTGTTGCAGTTAAAAAGCTCGTAGTTGGATTTCTGGC  
AGGAGTGACCGACCACACACACCGTGTGTGAGTTGTGTCATTCTGGCCATCCTTGGTGAG  
ATCCTATTTGGCATTAAAGTTGTCGGGTAGGGGATAACCATCGTTTACTGTGAAAAAATTA  
GAGTGTTTAAAGCAGGCTTATGCCGTTGAATATATTAGCATGGAATAATAAGATAGGACT  
TTGAGTCTATTTTGTGGTTTTCGAGTCAAAGTAATGATTAATAGGGACAGTTGGGGGTA  
TTCGTATTTTATTGTCAGAGGTGAAATTCTGGATTTCTGAAAGACGAACTACTGCGAAA  
GCATTACCAAGGATGTTTTCA

>X85394.1\_S.\_pseudocostatum\_strain\_CCAP\_1077/7

AGCTCCAATAGCGTATATTAAGTTGTTGCAGTTAAAAAGCTCGTAGTTGGATTTCTGGC  
AGGAGTGACCGACCACACACACCGTGTGTGAGTTGTGTCATTCTGGCCATCCTTGGTGAG  
ATCCTATTTGGCATTAAAGTTGTCGGGTAGGGGATAACCATCGTTTACTGTGAAAAAATTA  
GAGTGTTTAAAGCAGGCTTATGCCGTTGAATATATTAGCATGGAATAATAAGATAGGACT  
TTGAGTCTATTTTGTGGTTTTCGAGTCAAAGTAATGATTAATAGGGACAGTTGGGGGTA  
TTCGTATTTTATTGTCAGAGGTGAAATTCTGGATTTCTGAAAGACGAACTACTGCGAAA  
GCATTACCAAGGATGTTTTCA

>AJ632208.1\_S.\_pseudocostatum\_strain\_SZN-B78

AGCTCCAATAGCGTATATTAAGTTGTTGCAGTTAAAAAGCTCGTAGTTGGATTTCTGGC  
AGGAGTGACCGACCACACACACCGTGTGTGAGTTGTGTCATTCTGGCCATCCTTGGTGAG  
ATCCTATTTGGCATTAAAGTTGTCGGGTAGGGGATAACCATCGTTTACTGTGAAAAAATTA  
GAGTGTTTAAAGCAGGCTTATGCCGTTGAATATATTAGCATGGAATAATAAGATAGGACT  
TTGAGTCTATTTTGTGGTTTTCGAGTCAAAGTAATGATTAATAGGGACAGTTGGGGGTA  
TTCGTATTTTATTGTCAGAGGTGAAATTCTGGATTTCTGAAAGACGAACTACTGCGAAA  
GCATTACCAAGGATGTTTTCA

>AB948148.1\_S.\_pseudocostatum\_strain\_FMR120

AGCTCCAATAGCGTATATTAAGTTGTTGCAGTTAAAAAGCTCGTAGTTGGATTTCTGGC  
AGGAGTGACCGACCACACACACCGTGTGTGAGTTGTGTCATTCTGGCCATCCTTGGTGAG  
ATCCTATTTGGCATTAAAGTTGTCGGGTAGGGGATAACCATCGTTTACTGTGAAAAAATTA

GAGTGTTTAAAGCAGGCTTATGCCGTTGAATATATTAGCATGGAATAATAAGATAGGACT  
TTGAGTCTATTTTGTGGTTTGCAGAGTCAAAGTAATGATTAATAGGGACAGTTGGGGGTA  
TTCGTATTTTCATTGTCAGAGGTGAAATTCTGGATTTCTGAAAGACGAACTACTGCGAAA  
GCATTACCAAGGATGTTTTCA

>AJ632206.1\_S.\_pseudocostatum\_strain\_CCAP1077-7

AGCTCCAATAGCGTATATTAAGTTGTTGCAGTTAAAAAGCTCGTAGTTGGATTTCTGGC  
AGGAGTGACCGACCACACACACCGTGTGTGAGTTGTGTCATTCTGGCCATCCTTGGTGAG  
ATCCTATTTGGCATTAAAGTTGTCGGGTAGGGGATAACCATCGTTTACTGTGAAAAAATTA  
GAGTGTTTAAAGCAGGCTTATGCCGTTGAATATATTAGCATGGAATAATAAGATAGGACT  
TTGAGTCTATTTTGTGGTTTGCAGAGTCAAAGTAATGATTAATAGGGACAGTTGGGGGTA  
TTCGTATTTTCATTGTCAGAGGTGAAATTCTGGATTTCTGAAAGACGAACTACTGCGAAA  
GCATTACCAAGGATGTTTTCA

**Supplementary Dataset 2. *Pseudo-nitzschia australis* and *P. multiseriis* V4 sequences.**

>JN599166.1\_P\_australis

AGCTCCAATAGCGTATATTAAGTTGTTGCAGTTAAAAAGCTCGTAGTTGGATTTGTGGT  
GTGTCCAGTCGGCCTTTGCTCTTTGAGTGATTGCGCTGTACTGGTCTGCCATGTTTGGGT  
GGAATCTGTGTGGCATTAAAGTTGTCGTGCAGGGGATGCCCATCGTTTACTGTGAAAAAAT  
TAGAGTGTTCAAAGCAGGCTTATGCCGTTGAATATATTAGCATGGAATAATGATATAGGA  
CCTTGGTACTATTTTGTGGTTTGCGCACTAAGGTAATGATTAAGAGGGACAGTTGGGGG  
TATTTGTATTCCATTGTCAGAGGTGAAATTCTGGATTTT-TGGAAGACAACTACTGCG  
AAAGCATTACCAAGGATGTTTTCA

>GU373964.1\_P\_multiseriis

AGCTCCAATAGCGTATATTAAGTTGTTGCAGTTAAAAAGCTCGTAGTTGGATTTGTGGT  
GTGTCCAGTCGGCCTTTGCTCTTTGAGTGATTGCGCTGTACTGGTCTGCCATGTTTGGGT  
GGAATCTGTGTGGCATTAAAGTTGTCGTGCAGGGGATGCCCATCGTTTACTGTGAAAAAAT  
TAGAGTGTTCAAAGCAGGCTTATGCCGTTGAATATATTAGCATGGAATAATGATATAGGA  
CCTTGGTACTATTTTGTGGTTTGCGCACTAAGGTAATGATTAAGAGGGACAGTTGGGGG  
TATTTGTATTCCATTGTCAGAGGTGAAATTCTGGATTTT-TGGAAGACAACTACTGCG  
AAAGCATTACCAAGGATGTTTTCA

>U18241.1\_P\_multiseriis

AGCTCCAATAGCGTATATTAAGTTGTTGCAGTTAAAAAGCTCGTAGTTGGATTTGTGGT  
GTGTCCAGTCGGCCTTTGCTCTTTGAGTGATTGCGCTGTACTGGTCTGCCATGTTTGGGT  
GGAATCTGTGTGGCATTAAAGTTGTCGTGCAGGGGATGCCCATCGTTTACTGTGAAAAAAT  
TAGAGTGTTCAAAGCAGGCTTATGCCGTTGAATATATTAGCATGGAATAATGATATAGGA  
CCTTGGTACTATTTTGTGGTTTGCGCACTAAGGTAATGATTAAGAGGGACAGTTGGGGG  
TATTTGTATTCCATTGTCAGAGGTGAAATTCTGGATTTT-TGGAAGACAACTACTGCG  
AAAGCATTACCAAGGATGTTTTCA

>AM235381.1\_P\_multiseriis\_strain\_TKA\_2-28

AGCTCCAATAGCGTATATTAAGTTGTTGCAGTTAAAAAGCTCGTAGTTGGATTTGTGGT

GTGTCCAGTCGGCCTTTGCTCTTTGAGTGATTGCGCTGTACTGGTCTGCCATGTTTGGGT  
GGAATCTGTGTGGCATTAAAGTTGTCGTGCAGGGGATGCCCATCGTTTACTGTGAAAAAAT  
TAGAGTGTTCAAAGCAGGCTTATGCCGTTGAATATATTAGCATGGAATAATGATATAGGA  
CCTTGGTACTATTTTGTGGTTTGCGCACTAAGGTAATGATTAAGAGGGACAGTTGGGGG  
TATTTGTATTCCATTGTCAGAGGTGAAATTCTTGGATTTT-TGGAAGACAACTACTGCG  
AAAGCATTACCAAGGATGTTTTCA

>AY221947.1\_P\_multiseries

AGCTCCAATAGCGTATATTAAGTTGTTGCAGTTAAAAAGCTCGTAGTTGGATTTGTGGT  
GTGTCCAGTCGGCCTTTGCTCTTTGAGTGATTGCGCTGTACTGGTCTGCCATGTTTGGGT  
GGAATCTGTGTGGCATTAAAGTTGTCGTGCAGGGGATGCCCATCGTTTACTGTGAAAAAAT  
TAGAGTGTTCAAAGCAGGCTTATGCCGTTGAATATATTAGCATGGAATAATGATATAGGA  
CCTTGGTACTATTTTGTGGTTTGCGCACTAAGGTAATGATTAAGAGGGACAGTTGGGGG  
TATTTGTATTCCATTGTCAGAGGTGAAATTCTTGGATTTT-TGGAAGACAACTACTGCG  
AAAGCATTACCAAGGATGTTTTCA

>U18241.1\_P\_multiseries

AGCTCCAATAGCGTATATTAAGTTGTTGCAGTTAAAAAGCTCGTAGTTGGATTTGTGGT  
GTGTCCAGTCGGCCTTTGCTCTTTGAGTGATTGCGCTGTACTGGTCTGCCATGTTTGGGT  
GGAATCTGTGTGGCATTAAAGTTGTCGTGCAGGGGATGCCCATCGTTTACTGTGAAAAAAT  
TAGAGTGTTCAAAGCAGGCTTATGCCGTTGAATATATTAGCATGGAATAATGATATAGGA  
CCTTGGTACTATTTTGTGGTTTGCGCACTAAGGTAATGATTAAGAGGGACAGTTGGGGG  
TATTTGTATTCCATTGTCAGAGGTGAAATTCTTGGATTTT-TGGAAGACAACTACTGCG  
AAAGCATTACCAAGGATGTTTTCA

>GU373961.1\_P\_australis

AGCTCCAATAGCGTATATTAAGTTGTTGCAGTTAAAAAGCTCGTAGTTGGATTTGTGGT  
GTGTCCAGTCGGCCTTTGCTCTTTGAGTGATTGCGCTGTACTGGTCTGCCATGTTTGGGT  
GGAATCTGTGTGGCATTAAAGTTGTCGTGCAGGGGATGCCCATCGTTTACTGTGAAAAAAT  
TAGAGTGTTCAAAGCAGGCTTATGCCGTTGAATATATTAGCATGGAATAATGATATAGGA  
CCTTGGTACTATTTTGTGGTTTGCGCACTAAGGTAATGATTAAGAGGGACAGTTGGGGG

TATTTGTATTCCATTGTCAGAGGTGAAATTCTGGGTTTT-TGGAAGACAAACTACTGCG  
AAAGCATTACCAAGGATGTTTTCA

>AM235382.1\_P\_multiseries\_strain\_POMX

AGCTCCAATAGCGTATATTAAGTTGTTGCAGTTAAAAAGCTCGTAGTTGGATTCTGTTGGT  
GTGTCCAGTCGGCCTTTGCTCTTTGAGTGATTGCGCTGTACTGGTCTGCCATGTTTGGGT  
GGAATCTGTGTGGCATTAAAGTTGTCGTGCAGGGGATGCCCATCGTTTACTGTGAAAAAAT  
TAGAGTGTTCAAAGCAGGCTTATGCCGTTGAATATATTAGCATGGAATAATGATATAGGA  
CCTTGGTACTATTTTGTGGTTTTGCGCACTAAGGTAATGATTAAGAGGGACAGTTGGGGG  
TATTTGTATTCCATTGTCAGAGGTGAAATTCTGGATTTT-TGGAAGACAAACTACTGCG  
AAAGCATTACCAAGGATGTTTTCA

>AM235380.1\_P\_multiseries\_strain\_Nparl

AGCTCCAATAGCGTATATTAAGTTGTTGCAGTTAAAAAGCTCGTAGTTGGATTCTGTTGGT  
GTGTCCAGTCGGCCTTTGCTCTTTGAGTGATTGCGCTGTACTGGTCTGCCATGTTTGGGT  
GGAATCTGTGTGGCATTAAAGTTGTCGTGCAGGGGATGCCCATCGTTTACTGTGAAAAAAT  
TAGAGTGTTCAAAGCAGGCTTATGCCGTTGAATATATTAGCATGGAATAATGATATAGGA  
CCTTGGTACTATTTTGTGGTTTTGCGCACTAAGGTAATGATTAAGAGGGACAGTTGGGGG  
TATTTGTATTCCATTGTCAGAGGTGAAATTCTGGATTTT-TGGAAGACAAACTACTGCG  
AAAGCATTACCAAGGATGTTTTCA
